# Supplementary material
Source: PubMed Central journal article supplement (PMC5811194)
Supplement: NIHMS705423-supplement-1.pdf [file NIHMS705423-supplement-1.pdf]

**Supplemental Table 1:** Ten genes that constitute the RSI model, with corresponding Illumina BeadChip probes.

| <b>Gene Symbol</b> | <b>GeneID</b> | <b>RefSeq Match</b>            | <b>Illumina HumanWG-6 v3.0 BeadChip</b> |
|--------------------|---------------|--------------------------------|-----------------------------------------|
| AR                 | 367           | <a href="#">NM_000044.3</a>    | ILMN_1767351                            |
| JUN                | 3725          | <a href="#">NM_002228.3</a>    | ILMN_1806023                            |
| STAT1              | 6772          | <a href="#">NM_007315.3</a>    | ILMN_1690105                            |
| PRKCB              | 5579          | <a href="#">NM_212535.2</a>    | ILMN_1713603                            |
| RELA               | 5970          | <a href="#">NM_001243985.1</a> | ILMN_1705266                            |
| ABL1               | 25            | <a href="#">NM_005157.4</a>    | ILMN_1713732                            |
| SUMO1              | 7341          | <a href="#">NM_001005782.1</a> | ILMN_1790105                            |
| PAK2               | 5062          | <a href="#">NM_002577.4</a>    | ILMN_1659878                            |
| HDAC1              | 3065          | <a href="#">NM_004964.2</a>    | ILMN_1727458                            |
| IRF1               | 3659          | <a href="#">NM_002198.2</a>    | ILMN_1708375                            |
