# Supplementary material
Source: PubMed Central journal article supplement (PMC5811194)
Supplement: NIHMS705423-supplement-3.pdf [file NIHMS705423-supplement-3.pdf]

**Supplementary Table 2. Distribution of Clinical Variables by RSI Subtype**

| Variable                    | Level         | N (%)       |            |              |             | P Value |
|-----------------------------|---------------|-------------|------------|--------------|-------------|---------|
|                             |               | Total       | Sensitive  | Intermediate | Resistant   |         |
| Age                         | Median(Range) | 44 (23, 50) | 44 (23,50) | 43(27,50)    | 44 (23, 50) | 0.5469  |
| RT Total dose               | <=66Gy        | 242 (70.8%) | 59 (68.6%) | 124 (71.7%)  | 59 (71.1%)  | 0.8801  |
|                             | >66Gy         | 100 (29.2%) | 27 (31.4%) | 49 (28.3%)   | 24 (28.9%)  |         |
|                             | Total         | 342         | 86 (25.1%) | 173 (50.6%)  | 83 (24.3%)  |         |
| Origin                      | Dutch         | 148 (43.1%) | 37 (42.5%) | 77 (44.5%)   | 34 (41%)    | 0.8688  |
|                             | French        | 195 (56.9%) | 50 (57.5%) | 96 (55.5%)   | 49 (59%)    |         |
|                             | Total         | 343         | 87 (25.4%) | 173 (50.4%)  | 83 (24.2%)  |         |
| Local_Recurrence            | No Recurrence | 224 (65.3%) | 57 (65.5%) | 113 (65.3%)  | 54 (65.1%)  | 1.0000  |
|                             | Recurrence    | 119 (34.7%) | 30 (34.5%) | 60 (34.7%)   | 29 (34.9%)  |         |
|                             | Total         | 343         | 87 (25.4%) | 173 (50.4%)  | 83 (24.2%)  |         |
| T stage                     | pT1           | 216 (63.3%) | 52 (60.5%) | 110 (63.6%)  | 54 (65.9%)  | 0.7701  |
|                             | pT2-3         | 125 (36.7%) | 34 (39.5%) | 63 (36.4%)   | 28 (34.1%)  |         |
|                             | Total         | 341         | 86 (25.2%) | 173 (50.7%)  | 82 (24%)    |         |
| Surgical margin             | marg+         | 37 (11.2%)  | 12 (14%)   | 18 (10.8%)   | 7 (8.9%)    | 0.5688  |
|                             | marg-         | 294 (88.8%) | 74 (86%)   | 148 (89.2%)  | 72 (91.1%)  |         |
|                             | Total         | 331         | 86 (26%)   | 166 (50.2%)  | 79 (23.9%)  |         |
| Surgical margins - invasive | MargInv+      | 21 (6.5%)   | 7 (8.3%)   | 12 (7.5%)    | 2 (2.6%)    | 0.2737  |
|                             | MargInv-      | 302 (93.5%) | 77 (91.7%) | 149 (92.5%)  | 76 (97.4%)  |         |
|                             | Total         | 323         | 84 (26%)   | 161 (49.8%)  | 78 (24.1%)  |         |
| Surgical margins - DCIS     | MargDCIS+     | 8 (4.3%)    | 3 (6.1%)   | 5 (5.8%)     | 0 (0%)      | 0.2163  |
|                             | MargDCIS-     | 176 (94.1%) | 46 (93.9%) | 80 (93%)     | 50 (96.2%)  |         |
|                             | MargDCIS?     | 3 (1.6%)    | 0 (0%)     | 1 (1.2%)     | 2 (3.8%)    |         |
|                             | Total         | 187         | 49 (26.2%) | 86 (46%)     | 52 (27.8%)  |         |
| N stage                     | pN+           | 122 (36.2%) | 29 (34.5%) | 57 (33.1%)   | 36 (44.4%)  | 0.2089  |
|                             | pN-           | 215 (63.8%) | 55 (65.5%) | 115 (66.9%)  | 45 (55.6%)  |         |
|                             | Total         | 337         | 84 (24.9%) | 172 (51%)    | 81 (24%)    |         |
| RT boost                    | boost         | 248 (72.5%) | 63 (73.3%) | 124 (71.7%)  | 61 (73.5%)  | 0.9492  |
|                             | no boost      | 94 (27.5%)  | 23 (26.7%) | 49 (28.3%)   | 22 (26.5%)  |         |
|                             | Total         | 342         | 86 (25.1%) | 173 (50.6%)  | 83 (24.3%)  |         |
| Chemotherapy (CT)           | CT            | 133 (38.9%) | 37 (42.5%) | 58 (33.7%)   | 38 (45.8%)  | 0.1270  |
|                             | no CT         | 209 (61.1%) | 50 (57.5%) | 114 (66.3%)  | 45 (54.2%)  |         |
|                             | Total         | 342         | 87 (25.4%) | 172 (50.3%)  | 83 (24.3%)  |         |
| Hormonal therapy            | HT            | 31 (9.1%)   | 10 (11.5%) | 11 (6.4%)    | 10 (12%)    | 0.2201  |

|                 |                     |             |            |             |            |        |
|-----------------|---------------------|-------------|------------|-------------|------------|--------|
| (HT)            | no HT               | 311 (90.9%) | 77 (88.5%) | 161 (93.6%) | 73 (88%)   |        |
|                 | Total               | 342         | 87 (25.4%) | 172 (50.3%) | 83 (24.3%) |        |
| Histology shape | multinodular        | 16 (4.9%)   | 4 (4.9%)   | 10 (6%)     | 2 (2.6%)   | 0.0646 |
|                 | sharply demarcated  | 86 (26.5%)  | 31 (37.8%) | 38 (22.8%)  | 17 (22.4%) |        |
|                 | stellate            | 223 (68.6%) | 47 (57.3%) | 119 (71.3%) | 57 (75%)   |        |
|                 | Total               | 325         | 82 (25.2%) | 167 (51.4%) | 76 (23.4%) |        |
| Histology type  | ductal              | 292 (85.1%) | 74 (85.1%) | 149 (86.1%) | 69 (83.1%) | 0.2071 |
|                 | lobular             | 26 (7.6%)   | 3 (3.4%)   | 15 (8.7%)   | 8 (9.6%)   |        |
|                 | other type          | 25 (7.3%)   | 10 (11.5%) | 9 (5.2%)    | 6 (7.2%)   |        |
|                 | Total               | 343         | 87 (25.4%) | 173 (50.4%) | 83 (24.2%) |        |
| Grade           | EEI                 | 55 (16.2%)  | 13 (15.3%) | 29 (16.9%)  | 13 (15.9%) | 0.0764 |
|                 | EEII                | 147 (43.4%) | 27 (31.8%) | 79 (45.9%)  | 41 (50%)   |        |
|                 | EEIII               | 137 (40.4%) | 45 (52.9%) | 64 (37.2%)  | 28 (34.1%) |        |
|                 | Total               | 339         | 85 (25.1%) | 172 (50.7%) | 82 (24.2%) |        |
| tubuleformation | NA                  | 9 (2.6%)    | 4 (4.6%)   | 3 (1.7%)    | 2 (2.4%)   | 0.5312 |
|                 | tubule50-90%        | 79 (23%)    | 14 (16.1%) | 46 (26.6%)  | 19 (22.9%) |        |
|                 | tubule<10%          | 235 (68.5%) | 63 (72.4%) | 115 (66.5%) | 57 (68.7%) |        |
|                 | tubule>90%          | 20 (5.8%)   | 6 (6.9%)   | 9 (5.2%)    | 5 (6%)     |        |
|                 | Total               | 343         | 87 (25.4%) | 173 (50.4%) | 83 (24.2%) |        |
| Polymorphism    | polymorph1          | 15 (4.5%)   | 2 (2.4%)   | 11 (6.5%)   | 2 (2.5%)   | 0.0207 |
|                 | polymorph2          | 131 (39.3%) | 23 (27.7%) | 69 (40.8%)  | 39 (48.1%) |        |
|                 | polymorph3          | 187 (56.2%) | 58 (69.9%) | 89 (52.7%)  | 40 (49.4%) |        |
|                 | Total               | 333         | 83 (24.9%) | 169 (50.8%) | 81 (24.3%) |        |
| Mitotic index   | mitotic1            | 174 (52.9%) | 33 (40.2%) | 96 (57.5%)  | 45 (56.3%) | 0.0033 |
|                 | mitotic2            | 59 (17.9%)  | 11 (13.4%) | 33 (19.8%)  | 15 (18.8%) |        |
|                 | mitotic3            | 96 (29.2%)  | 38 (46.3%) | 38 (22.8%)  | 20 (25%)   |        |
|                 | Total               | 329         | 82 (24.9%) | 167 (50.8%) | 80 (24.3%) |        |
| DCIS inside     | DCIS inside         | 93 (38%)    | 20 (28.6%) | 47 (41.2%)  | 26 (42.6%) | 0.1544 |
|                 | No DCIS inside      | 152 (62%)   | 50 (71.4%) | 67 (58.8%)  | 35 (57.4%) |        |
|                 | Total               | 245         | 70 (28.6%) | 114 (46.5%) | 61 (24.9%) |        |
| DCIS - outside  | DCIS outside        | 75 (31.9%)  | 19 (31.7%) | 39 (33.3%)  | 17 (29.3%) | 0.8504 |
|                 | No DCIS outside     | 160 (68.1%) | 41 (68.3%) | 78 (66.7%)  | 41 (70.7%) |        |
|                 | Total               | 235         | 60 (25.5%) | 117 (49.8%) | 58 (24.7%) |        |
| DCIS present    | DCIS                | 211 (64.1%) | 50 (60.2%) | 109 (66.5%) | 52 (63.4%) | 0.6148 |
|                 | No DCIS             | 118 (35.9%) | 33 (39.8%) | 55 (33.5%)  | 30 (36.6%) |        |
|                 | Total               | 329         | 83 (25.2%) | 164 (49.8%) | 82 (24.9%) |        |
| DCIS - grade    | DCIS high grade     | 120 (57.4%) | 32 (64%)   | 61 (57%)    | 27 (51.9%) | 0.5841 |
|                 | DCIS intermed grade | 69 (33%)    | 12 (24%)   | 37 (34.6%)  | 20 (38.5%) |        |
|                 | DCIS low grade      | 20 (9.6%)   | 6 (12%)    | 9 (8.4%)    | 5 (9.6%)   |        |

|                                |              |             |            |             |            |        |
|--------------------------------|--------------|-------------|------------|-------------|------------|--------|
|                                | Total        | 209         | 50 (23.9%) | 107 (51.2%) | 52 (24.9%) |        |
| LCIS                           | LCIS present | 31 (9.3%)   | 3 (3.7%)   | 19 (11.2%)  | 9 (11.1%)  | 0.1274 |
|                                | No LCIS      | 301 (90.7%) | 79 (96.3%) | 150 (88.8%) | 72 (88.9%) |        |
|                                | Total        | 332         | 82 (24.7%) | 169 (50.9%) | 81 (24.4%) |        |
| Lympho-vascular invasion (LVI) | LVI present  | 11 (4.2%)   | 0 (0%)     | 6 (4.3%)    | 5 (7.9%)   | 0.0788 |
|                                | No LVI       | 254 (95.8%) | 61 (100%)  | 135 (95.7%) | 58 (92.1%) |        |
|                                | Total        | 265         | 61 (23%)   | 141 (53.2%) | 63 (23.8%) |        |
| LVI quadrant                   | 1 LVI        | 11 (13.8%)  | 0 (0%)     | 6 (17.6%)   | 5 (22.7%)  | 0.0305 |
|                                | 2-5 LVI      | 31 (38.8%)  | 8 (33.3%)  | 17 (50%)    | 6 (27.3%)  |        |
|                                | >5 LVI       | 38 (47.5%)  | 16 (66.7%) | 11 (32.4%)  | 11 (50%)   |        |
|                                | Total        | 80          | 24 (30%)   | 34 (42.5%)  | 22 (27.5%) |        |
| p53                            | p53+         | 24 (24.7%)  | 7 (26.9%)  | 13 (26.5%)  | 4 (18.2%)  | 0.7822 |
|                                | p53-         | 73 (75.3%)  | 19 (73.1%) | 36 (73.5%)  | 18 (81.8%) |        |
|                                | Total        | 97          | 26 (26.8%) | 49 (50.5%)  | 22 (22.7%) |        |
| ER status                      | 0            | 75 (21.9%)  | 28 (32.2%) | 30 (17.3%)  | 17 (20.5%) | 0.0246 |
|                                | 1            | 268 (78.1%) | 59 (67.8%) | 143 (82.7%) | 66 (79.5%) |        |
|                                | Total        | 343         | 87 (25.4%) | 173 (50.4%) | 83 (24.2%) |        |
| PR status                      | 0            | 138 (40.2%) | 42 (48.3%) | 64 (37%)    | 32 (38.6%) | 0.2015 |
|                                | 1            | 205 (59.8%) | 45 (51.7%) | 109 (63%)   | 51 (61.4%) |        |
|                                | Total        | 343         | 87 (25.4%) | 173 (50.4%) | 83 (24.2%) |        |
| Her-2-neu status               | 0            | 290 (84.5%) | 76 (87.4%) | 145 (83.8%) | 69 (83.1%) | 0.7139 |
|                                | 1            | 53 (15.5%)  | 11 (12.6%) | 28 (16.2%)  | 14 (16.9%) |        |
|                                | Total        | 343         | 87 (25.4%) | 173 (50.4%) | 83 (24.2%) |        |
| Proliferative Index_           | 0            | 173 (50.4%) | 34 (39.1%) | 97 (56.1%)  | 42 (50.6%) | 0.0348 |
|                                | 1            | 170 (49.6%) | 53 (60.9%) | 76 (43.9%)  | 41 (49.4%) |        |
|                                | Total        | 343         | 87 (25.4%) | 173 (50.4%) | 83 (24.2%) |        |
| Molecular subtype              | HER2         | 14 (4.1%)   | 2 (2.3%)   | 9 (5.2%)    | 3 (3.6%)   | 0.0249 |
|                                | LUMA         | 145 (42.3%) | 29 (33.3%) | 83 (48%)    | 33 (39.8%) |        |
|                                | LUMB         | 87 (25.4%)  | 21 (24.1%) | 43 (24.9%)  | 23 (27.7%) |        |
|                                | LUMHER       | 39 (11.4%)  | 9 (10.3%)  | 19 (11%)    | 11 (13.3%) |        |
|                                | TN           | 58 (16.9%)  | 26 (29.9%) | 19 (11%)    | 13 (15.7%) |        |
|                                | Total        | 343         | 87 (25.4%) | 173 (50.4%) | 83 (24.2%) |        |
| Triple Negative                | Not TN       | 285 (83.1%) | 61 (70.1%) | 154 (89%)   | 70 (84.3%) | 0.0004 |
|                                | TN           | 58 (16.9%)  | 26 (29.9%) | 19 (11%)    | 13 (15.7%) |        |
|                                | Total        | 343         | 87 (25.4%) | 173 (50.4%) | 83 (24.2%) |        |

**P Value is calculated using Chi square Test using exact method with Monte Carlo estimation.**
