# Supplementary material
Source: PubMed Central journal article supplement (PMC5811194)

Supplementary Figure 1: Remark Diagram of study

**GSE30682**

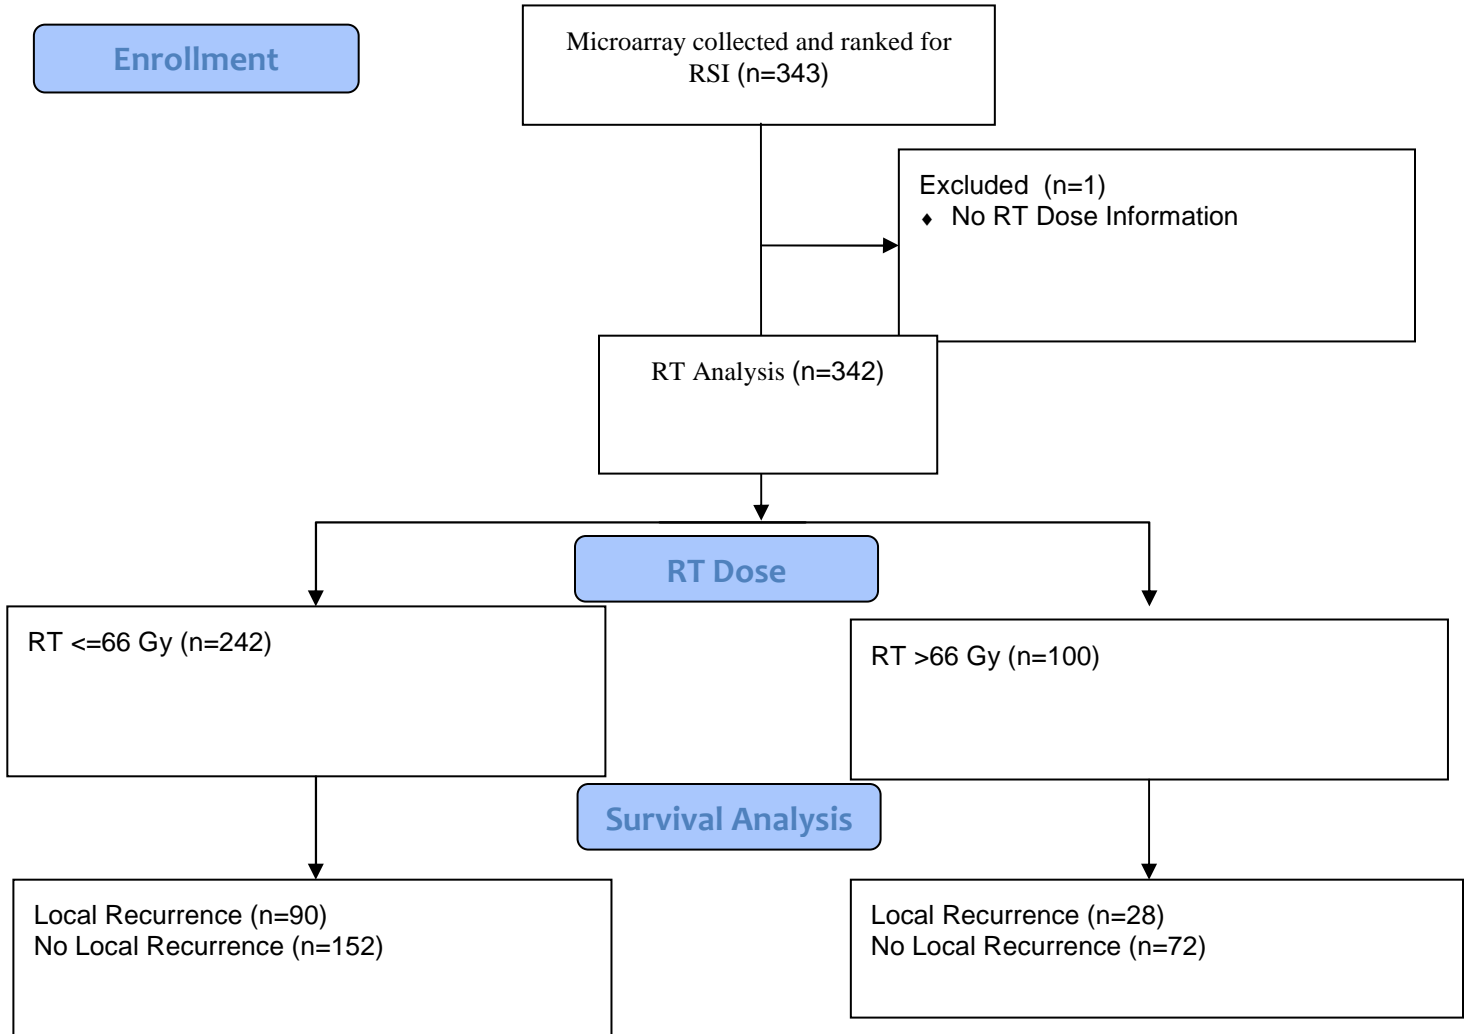

Supplement: NIHMS705423-supplement-2.pdf [file NIHMS705423-supplement-2.pdf]
